# Supplementary material
Source: PubMed Central journal article supplement (PMC9021357)
Supplement: mmc1.pdf [file mmc1.pdf]

**Supplemental information**

**Nasally delivered interferon- $\lambda$  protects  
mice against infection by SARS-CoV-2  
variants including Omicron**

**Zhenlu Chong, Courtney E. Karl, Peter J. Halfmann, Yoshihiro Kawaoka, Emma S. Winkler, Shamus P. Keeler, Michael J. Holtzman, Jinsheng Yu, and Michael S. Diamond**

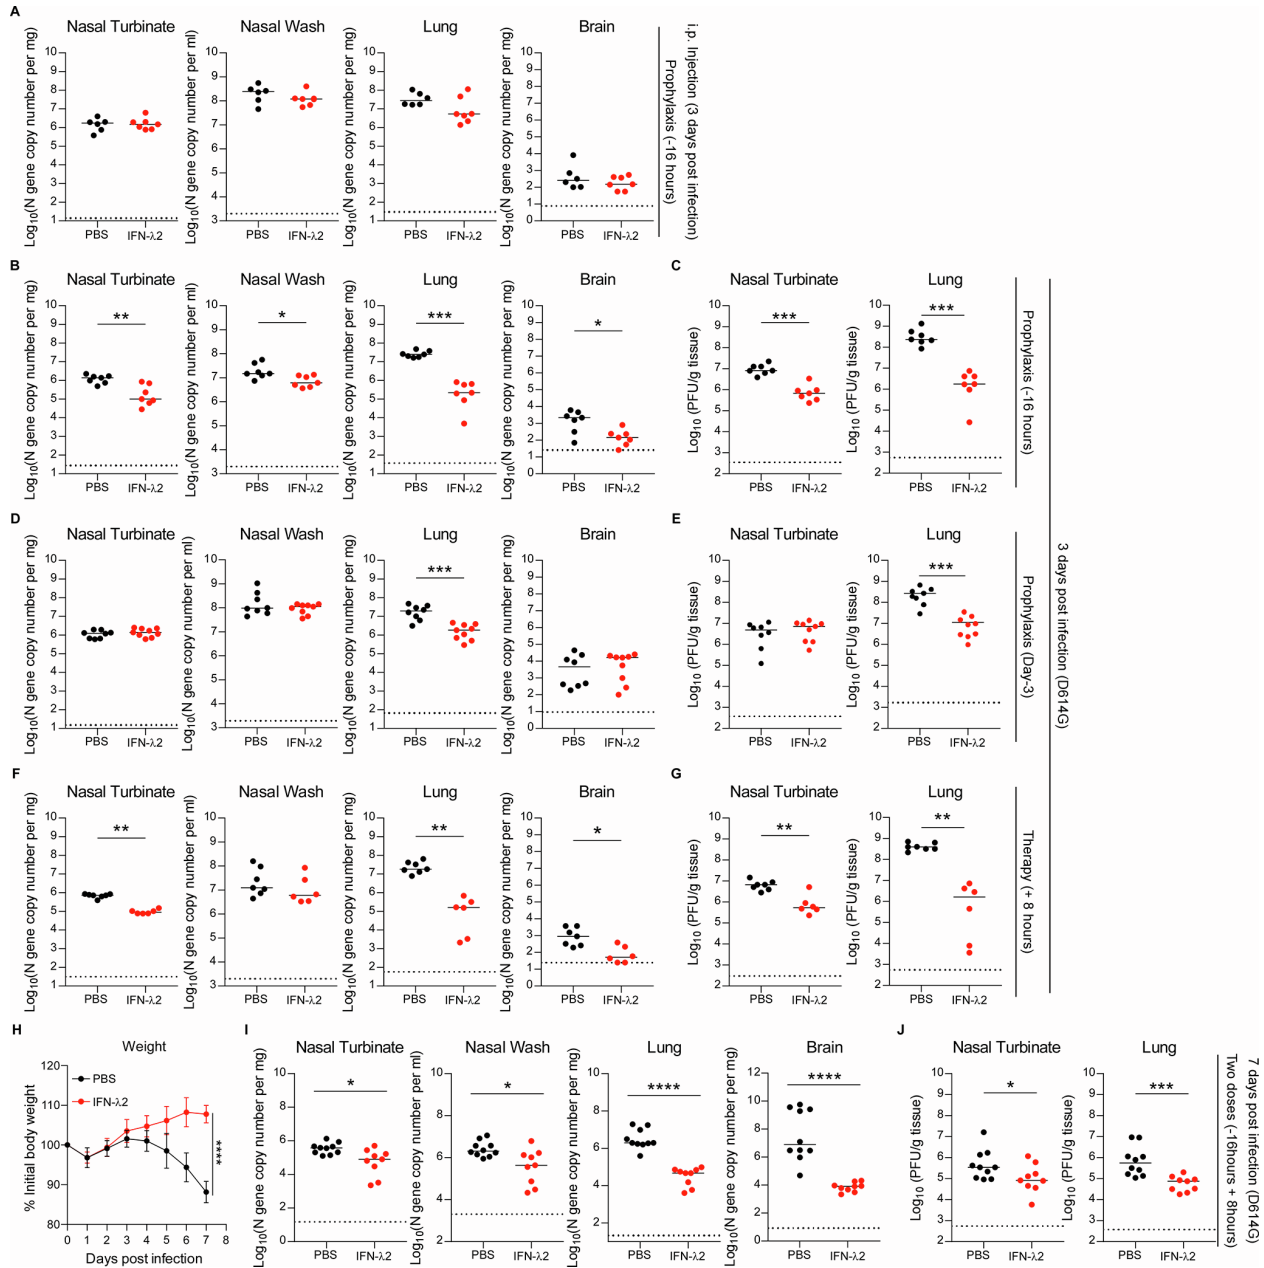

**Figure S1. SARS-CoV-2 viral burden in infected K18-hACE2 mice, Related to Figure 2.** (A) Eight-week-old female K18-hACE2 mice were inoculated by intranasal route with  $10^3$  FFU of WA1/2020 D614G. At -16 h before virus inoculation, mice were given 2  $\mu$ g of murine IFN- $\lambda$ 2 or PBS by intraperitoneal injection. Viral RNA levels at 3 dpi (n = 6-7 per group, 2 experiments). (B-G) Eight-week-old female K18-hACE2 mice were inoculated by intranasal route with  $10^3$  FFU of WA1/2020 D614G. At -16 h (B-C), D-3 (D-E) or +8 h (F-G), mice were given 2  $\mu$ g of murine IFN- $\lambda$ 2 or PBS by intranasal route. Viral RNA (B, D, and F) and infectious virus (C, E, and G) levels at 3 dpi (B-C: n = 7 per group, 2 experiments; D-E: n = 8-9 per group, 2 experiments; F-G: n = 6-7 per group, 2 experiments). (H-J) Eight-week-old female K18-hACE2 mice were treated with 2  $\mu$ g doses of murine IFN- $\lambda$ 2 or PBS by intranasal route at -16 h and +8 h relative to inoculation with  $10^3$  FFU of WA1/2020 D614G and harvested at 7 dpi. (H) Weight change was

monitored daily for 7 days. **(I)** Viral RNA levels at 7 dpi. **(J)** Infectious virus levels at 7 dpi (**H-J**: n = 9-10 per group, 2 experiments). Bars (**A-G and I-J**) indicate median values. Data were analyzed by Mann-Whitney test (**A-G and I-J**) or *t* tests of the area under the curve (**H**) (\**P* < 0.05, \*\**P* < 0.01, \*\*\**P* < 0.001, and \*\*\*\**P* < 0.0001).

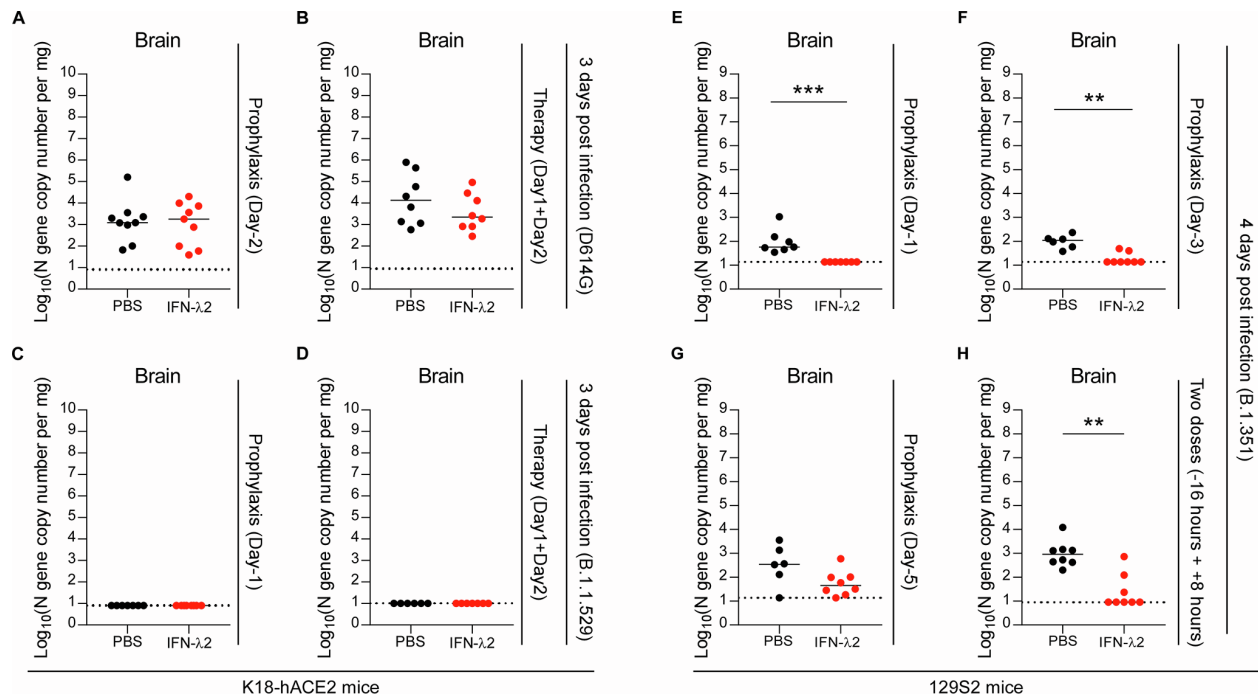

**Figure S2. SARS-CoV-2 viral burden in the brains of K18-hACE2 and 129S2 mice, Related to Figures 2 and 3.** (A-D) Eight-week-old (A-B) or five-month-old (C-D) female K18-hACE2 mice were inoculated by intranasal route with  $10^3$  FFU of WA1/2020 D614G (A-B) or B.1.1529 Omicron variant (C-D). At D-2 (A), D+1 and D+2 (B and D) or D-1 (C), mice were administered 2  $\mu$ g of murine IFN- $\lambda$ 2 or PBS by intranasal route. Viral RNA levels from brain at 3 dpi (A: n = 9 per group, 2 experiments; B: n = 8 per group, 2 experiments; C: n = 7-8 per group, 2 experiments; D: n = 6-7 per group, 2 experiments). (E-H) Six-week-old female 129S2 mice were inoculated by intranasal route with  $10^5$  FFU of B.1.351 Beta variant. At D-1 (E), D-3 (F), D-5 (G) or -16 h and +8 h (H), mice were administered 2  $\mu$ g of murine IFN- $\lambda$ 2 or PBS by intranasal route. Viral RNA levels from brain at 4 dpi (E: n = 7 per group, 2 experiments; F: n = 6-8 per group, 2 experiments; G: n = 6-8 per group, 2 experiments; H: n = 8 per group, 2 experiments). Bars indicate median values. Data were analyzed by Mann-Whitney test (\*\* $P < 0.01$  and \*\*\* $P < 0.001$ ).

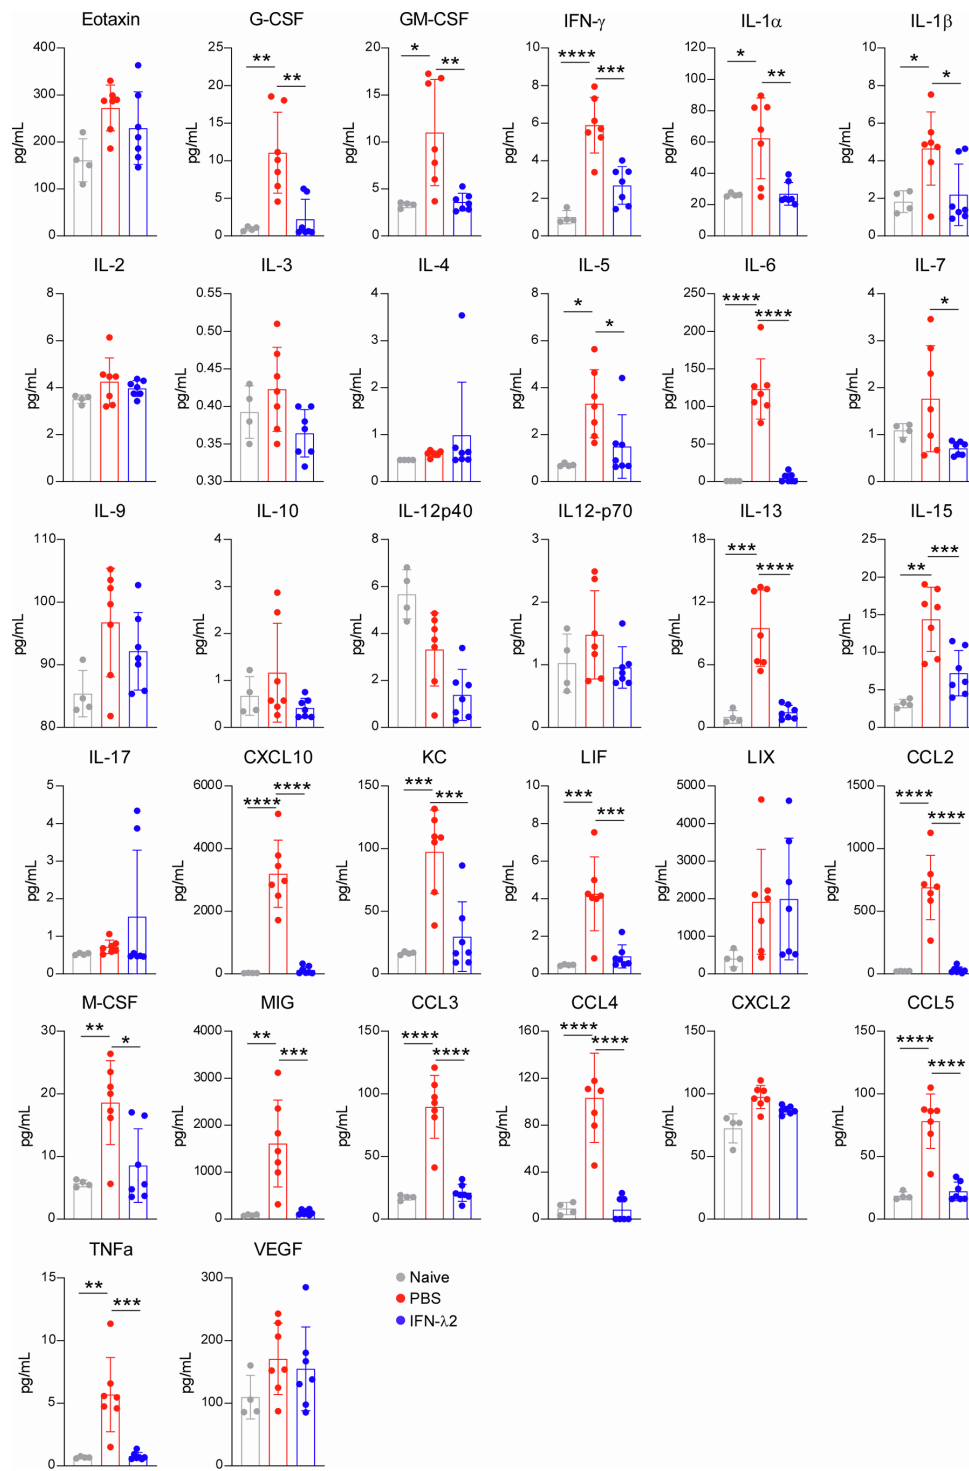

**Figure S3. Cytokine responses following IFN-λ treatment and SARS-CoV-2 infection, Related to Figure 2.** Eight-week-old female K18-hACE2 mice treated with 2 μg of murine IFN-λ2 or PBS at -16 h by the intranasal route were challenged with  $10^3$  FFU of WA1/2020 D614G. Cytokine levels in lung homogenates at 3 dpi (2 experiments, n = 7 per group except naïve n = 4). Data were analyzed by one-way ANOVA with Tukey's multiple comparison test (\* $P < 0.05$ , \*\* $P < 0.01$ , \*\*\* $P < 0.001$ , and \*\*\*\* $P < 0.0001$ ).

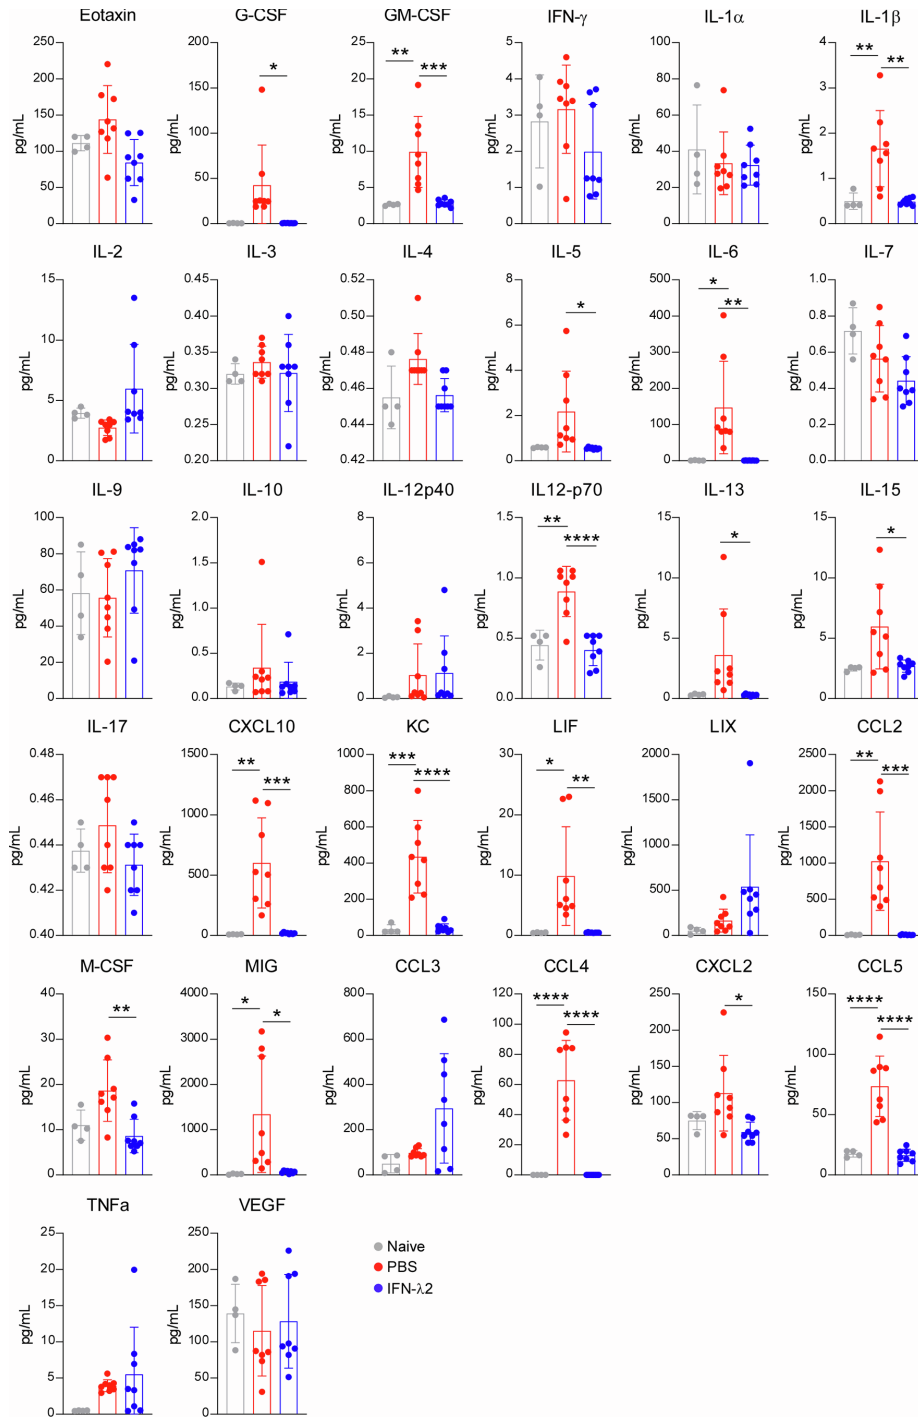

**Figure S4. Cytokine induction following IFN-λ treatment and SARS-CoV-2 infection, Related to Figure 3.** Six-week-old female 129S2 mice treated with two doses of 2 μg of murine IFN-λ2 or PBS at -16 h and +8 h by the intranasal route were challenged with 10<sup>5</sup> FFU of B.1.351 Beta variant. Cytokine levels in lung homogenates at 4 dpi (n = 7 per group except naïve n = 4, 2 experiments). Data analyzed by one-way ANOVA with Tukey's multiple comparison test (\**P* < 0.05, \*\**P* < 0.01, \*\*\**P* < 0.001 and \*\*\*\**P* < 0.0001).

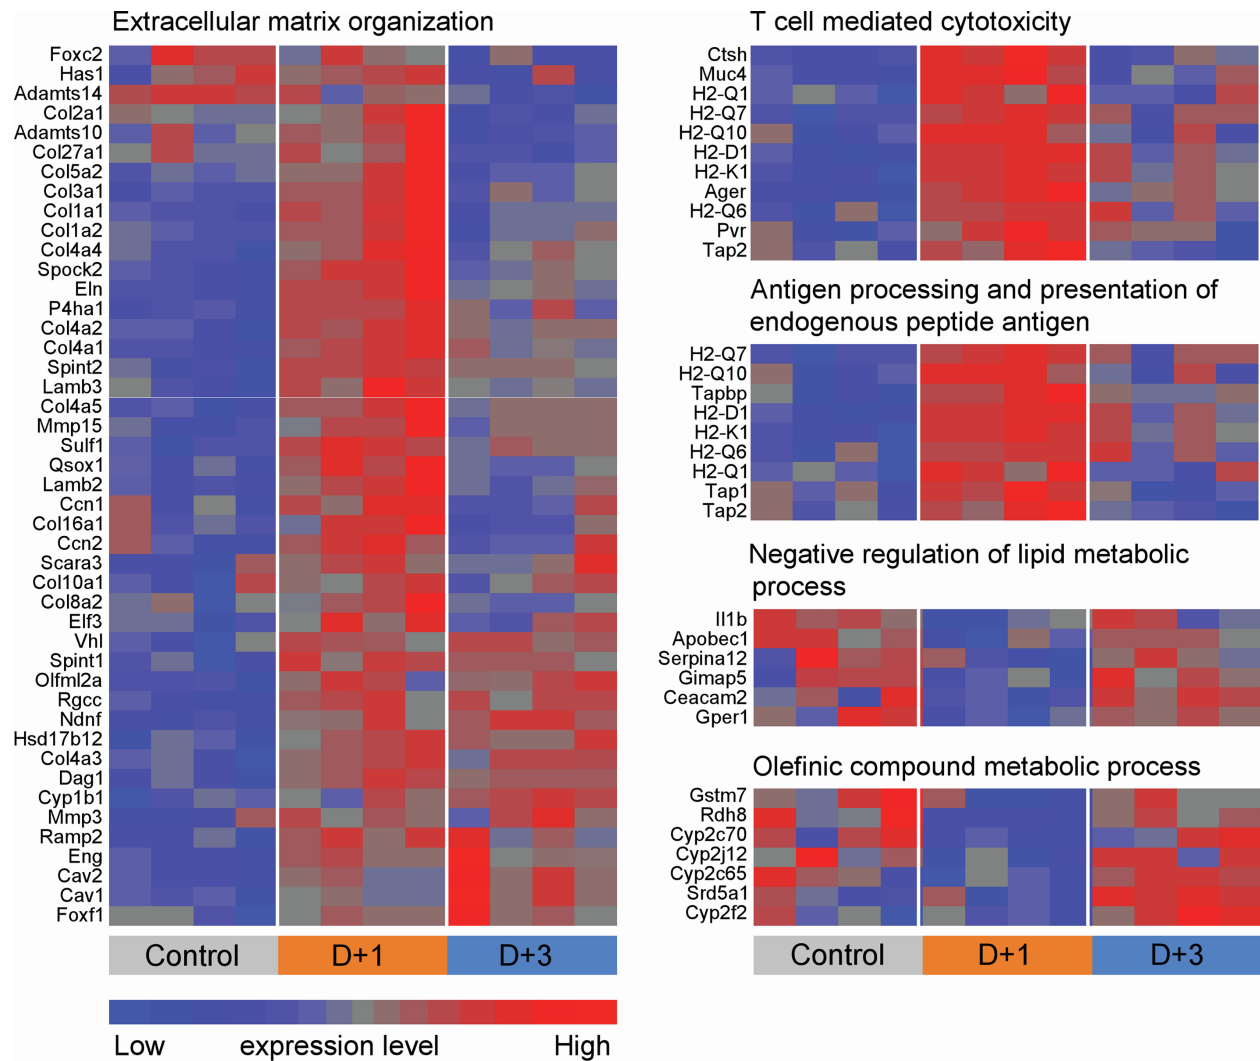

**Figure S5. Heatmaps of RNA-seq data, Related to Figure 4.** Heatmaps of selected significantly upregulated or downregulated gene sets corresponding with IFN- $\lambda$ 2 treatment identified through GO analysis. Genes shown in each pathway are the union of the differentially expressed genes (DEGs) enriched in D+1 group or D+3 group versus control group (n = 4 per group). Columns represent sample groups and rows indicate genes.

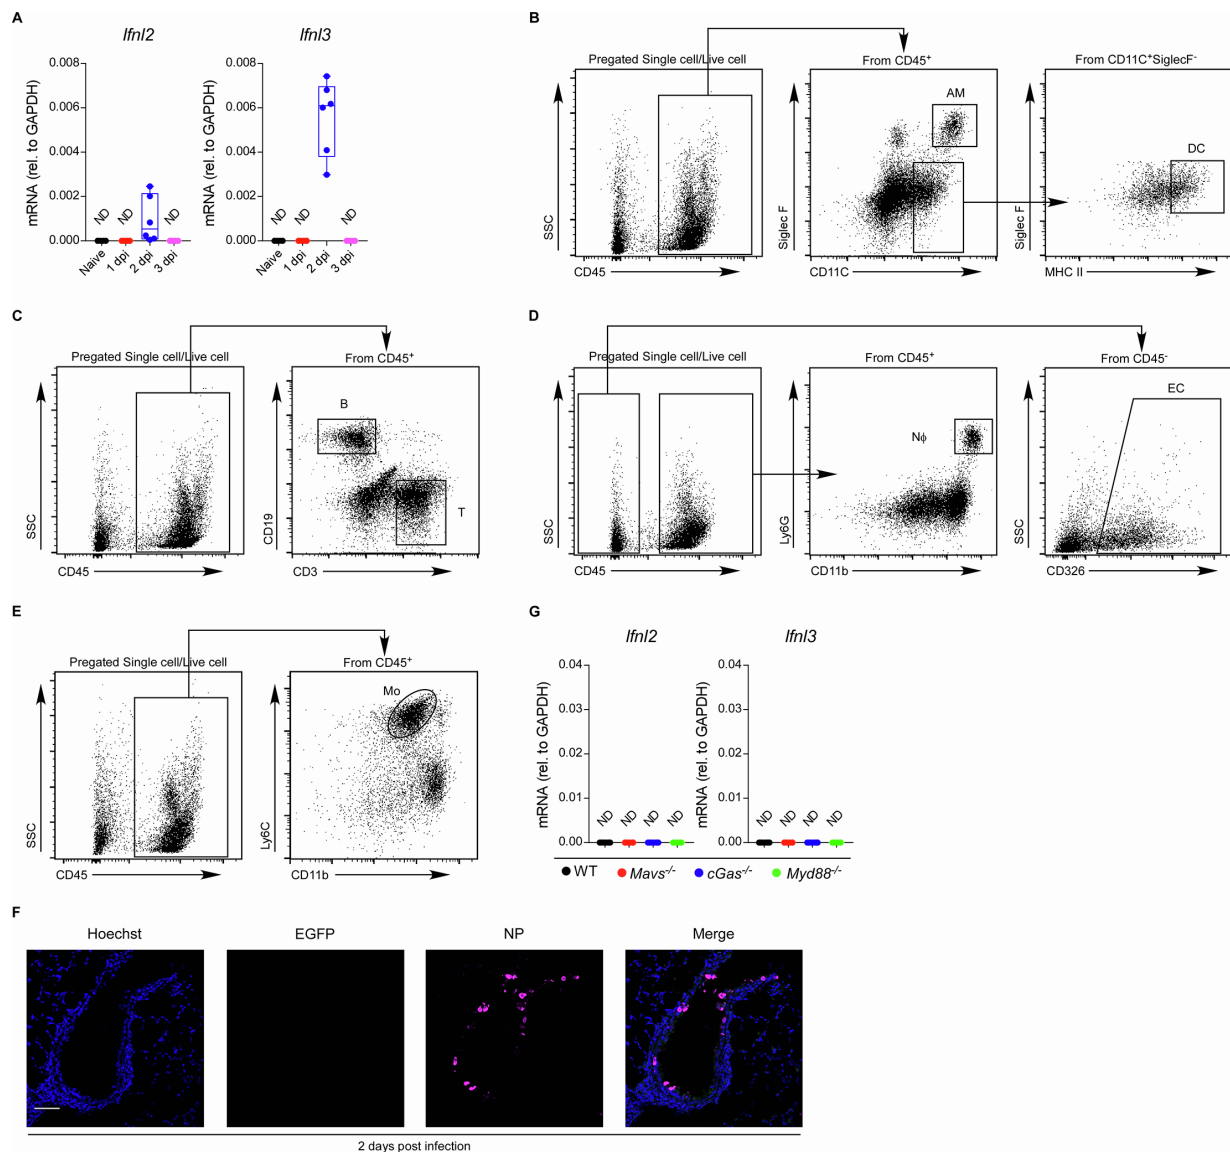

**Figure S6. Flow cytometric gating strategy and staining of lung cells, Related to Figure 5.** (A) Six-week-old male and female C57BL/6 mice were inoculated with  $10^5$  FFU of B.1.351 Beta variant. *Ifnl2* and *Ifnl3* mRNA levels from lungs were measured at indicated days after infection by qRT-PCR (n = 6 per group, 2 experiments) (ND, not detectable, qRT-PCR Ct value >40). (B-E) For lung tissues, cells were gated on single, live, CD45<sup>+</sup> and CD45<sup>-</sup> cells. Alveolar macrophages (AM) were identified as CD45<sup>+</sup> SiglecF<sup>hi</sup> CD11c<sup>hi</sup> cells, dendritic cells (DC) were identified as CD45<sup>+</sup> SiglecF<sup>+</sup> CD11c<sup>+</sup> MHCII<sup>+</sup> cells (B). B and T cells were identified as CD45<sup>+</sup> CD19<sup>+</sup> cells and CD45<sup>+</sup> CD3<sup>+</sup> cells, respectively (C). Neutrophils (N $\phi$ ) and epithelial cells (EC) were identified as CD45<sup>+</sup>CD11b<sup>+</sup>Ly6G<sup>+</sup> cells and CD45<sup>-</sup> CD326<sup>+</sup> cells, respectively (D). Monocytes (Mo) were identified as CD45<sup>+</sup> CD11b<sup>+</sup> Ly6C<sup>hi</sup> cells (E). (F) Localization of EGFP and SARS-CoV-2 nucleocapsid protein (NP) in the lungs of WT C57BL/6 (non-reporter, negative control) mice at 2 dpi. Frozen sections were stained for GFP (green), NP (magenta), and Hoechst (blue). Scale bar, 50  $\mu$ m. (G) *Ifnl2* and *Ifnl3* mRNA levels from lungs of six-week-old male and female naïve, uninfected WT, *Mavs*<sup>-/-</sup>, *cGas*<sup>-/-</sup> and *Myd88*<sup>-/-</sup> C57BL/6 mice were measured by qRT-PCR (n = 6-8 per group, 2 experiments) (ND, not detectable, qRT-PCR Ct value > 40).

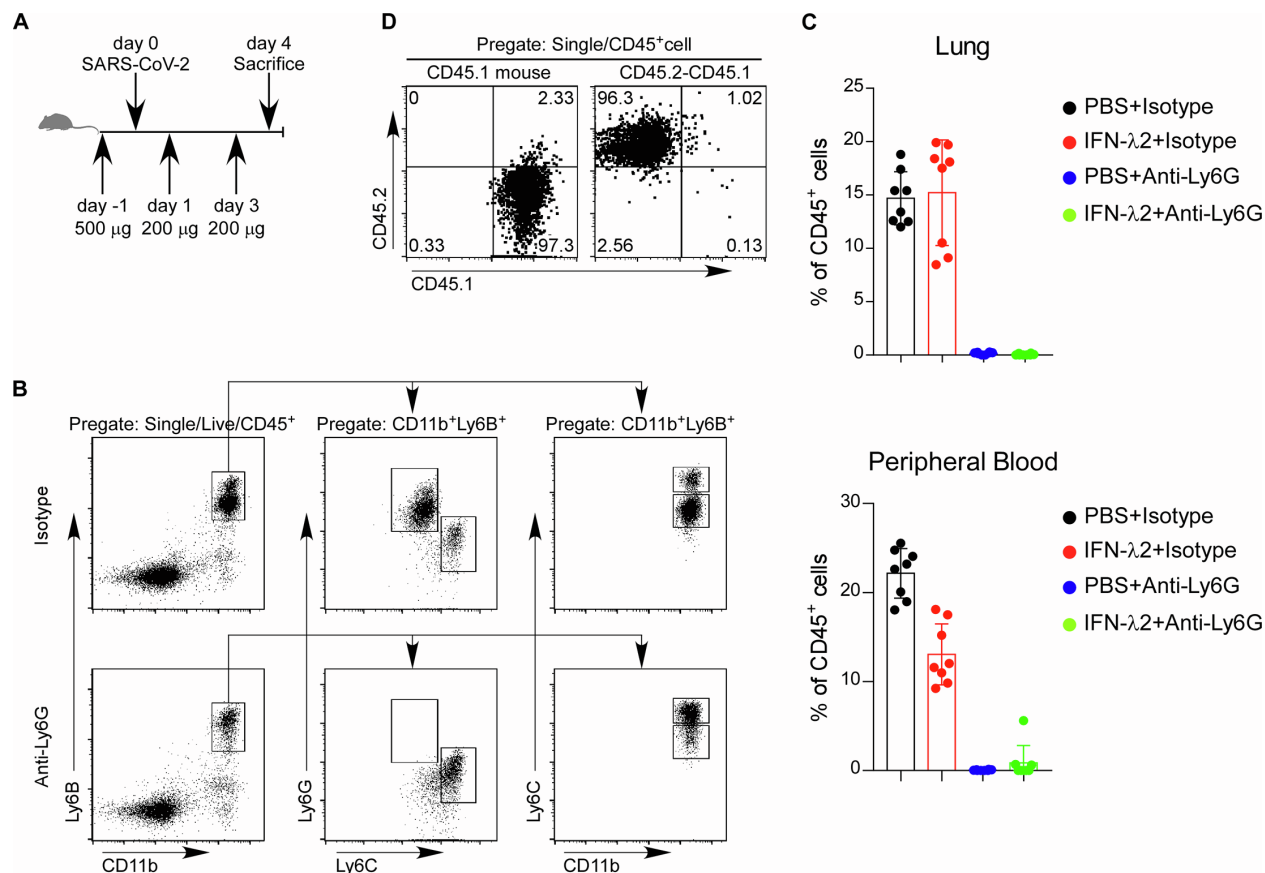

**Figure S7. Flow cytometry analysis of peripheral blood and lungs from neutrophil-depleted or bone marrow chimeric mice, Related to Figure 6.** (A) Experimental scheme of neutrophil deletion in 129S2 mice. (B) (Left) Representative flow cytometry plots of peripheral blood at D+4 following intraperitoneal injection of a depleting anti-Ly6G mAb (1A8) or isotype control mAb. (Right) Frequency of mature neutrophils (CD11b<sup>+</sup>Ly6B<sup>+</sup>Ly6G<sup>+</sup>Ly6C<sup>int</sup>) in blood are shown after antibody depletion. (C) Frequency of mature neutrophils (CD11b<sup>+</sup>Ly6B<sup>+</sup>Ly6G<sup>+</sup>Ly6C<sup>int</sup>) in lungs are shown after antibody depletion (n = 8 per group, 2 experiments). (D) Representative flow cytometry plots of peripheral blood at 10 weeks after irradiation and bone marrow cell transplantation of CD45.2 cells to CD45.1 recipient mice.
